1 **Benfotiamine reduces pathology and improves muscle function in *mdx* mice.**

2

3

4 Keryn G. Woodman<sup>1,2</sup>, Chantal A. Coles<sup>1</sup>, Su L Toulson<sup>2</sup>, Elizabeth M. Gibbs<sup>3,6</sup>, Matthew  
5 Knight<sup>4</sup>, Matthew McDonagh<sup>4</sup>, Rachelle H. Crosbie-Watson<sup>3, 5, 6</sup>, Shireen R. Lamandé<sup>1,7</sup> and  
6 Jason D. White<sup>1,2\*</sup>

7

8

9

10 <sup>1</sup> Murdoch Childrens Research Institute, The Royal Children's Hospital, Melbourne, Victoria,  
11 Australia

12 <sup>2</sup> Faculty of Veterinary and Agricultural Sciences, The University of Melbourne, Victoria,  
13 Australia

14 <sup>3</sup> Department of Integrative Biology and Physiology, University of California Los Angeles

15 <sup>4</sup> Biosciences Research Division, Victorian AgriBiosciences Centre, Department of Primary  
16 Industries, 1 Park Drive, Bundoora, Victoria, Australia, 3083.

17 <sup>5</sup> Department of Neurology, David Geffen School of Medicine, University of California Los  
18 Angeles

19 <sup>6</sup> Center for Duchenne Muscular Dystrophy, University of California Los Angeles

20 <sup>7</sup> Department of Paediatrics, University of Melbourne, Victoria, Australia

21

22 \*Corresponding author: Jason White, Murdoch Children's Research Institute, 50 Flemington  
23 Road, Parkville, Victoria, Australia, 3052. [jason.white@mcri.edu.au](mailto:jason.white@mcri.edu.au)

24

25

26 The authors have declared no conflicts of interest.

27

28

29 **Abstract:**

30 Duchenne Muscular Dystrophy (DMD) is a progressive and fatal neuromuscular disease  
31 which arises from mutations in the dystrophin gene (*DMD*) that result in the absence or  
32 severe reduction of the cytoskeletal protein dystrophin. In addition to the primary  
33 dystrophin defect, secondary processes such as inflammation, calcium influx, dysregulated  
34 autophagy and fibrosis exacerbate dystrophic pathology and thus increase disease  
35 progression. While therapies to restore dystrophin deficiency are being developed,  
36 strategies which target these secondary processes could be of benefit to patients.  
37 Benfotiamine is a lipid soluble precursor to thiamine that can reduce secondary processes  
38 such as inflammation and oxidative stress in diabetic patients. As such we tested it in the  
39 *mdx* mouse model of DMD and found that benfotiamine reduced multiple markers of  
40 dystrophic pathology and improved grip strength. In addition, members of the utrophin and  
41 dystrophin glycoprotein complexes were significantly increased at the sarcolemma which  
42 could improve cell adhesion. We also demonstrated that benfotiamine treatment lowered  
43 the expression of macrophage markers and pro-inflammatory cytokines suggesting that  
44 benfotiamine is reducing dystrophic pathology by acting on inflammatory processes.

45

46 **Introduction:**

47

48 The muscular dystrophies are a group of genetic neuromuscular disorders that result in the  
49 progressive deterioration of skeletal muscle. Of these muscular dystrophies, Duchenne  
50 muscular dystrophy (DMD) is the most common affecting 1 out of every 5000 male births  
51 (1). This devastating condition results from mutations in the dystrophin gene leading to  
52 absence or severe reduction in dystrophin at the muscle plasma membrane (2). Dystrophin  
53 is a critical component of a large complex known as the dystrophin associated glycoprotein  
54 complex (DGC), present on the plasma membrane of the myofibre (3, 4). Dystrophin  
55 stabilises cells by linking actin filaments, intermediate filaments and microtubules to  
56 transmembrane complexes (5). Loss of dystrophin, and in most cases loss or reduction of  
57 the DGC, leads to membrane instability, increased susceptibility to mechanical stress and  
58 finally, degeneration of myofibres (6). Skeletal muscle possesses an innate ability to  
59 regenerate in response to injury but in DMD this is compromised over time due to the  
60 chronic nature of the damage and persistence of inflammatory cells (7). While the absence  
61 of dystrophin is the primary defect in DMD, it is becoming increasingly apparent that several  
62 secondary processes contribute to disease progression and associated muscle wasting in  
63 DMD. These include the activation of calcium influx, secretion of pro-inflammatory and pro-  
64 fibrotic mediators and defects in the clearance of damaged organelles through autophagy  
65 (8).

66

67 Normal muscle repair is a complex and highly regulated biological process. Following acute  
68 muscle injury resident macrophages and T lymphocytes are activated and other immune  
69 cells, including neutrophils, migrate to the injured tissue. The early immune response is  
70 driven by interferon and TNF $\alpha$  stimulation of M1 (classically activated) macrophages, which  
71 produce pro-inflammatory cytokines such as TNF $\alpha$  and IL-1 $\beta$  and remove the damaged  
72 tissue. After 1-3 days, the dominant macrophages become M2c which release anti-  
73 inflammatory cytokines, IL-10 and TGF $\beta$ , to deactivate M1 macrophages and promote repair  
74 (9-11). M2a macrophages (alternatively activated) are abundant later in the repair process  
75 and produce pro-fibrotic molecules such TGF $\beta$ . Macrophage-produced pro-inflammatory  
76 cytokines activate satellite cells and promote myoblast proliferation, while anti-  
77 inflammatory cytokines stimulate myoblast differentiation and fusion. Fibroblasts migrate

78 into damaged muscle and are stimulated by TGF $\beta$  and pro-inflammatory cytokines to  
79 produce and remodel the extracellular matrix (ECM). While ECM deposition is needed for  
80 efficient repair, precise regulation is crucial and dysregulation leads to fibrosis (12).

81

82 Muscle repair thus involves the co-ordinated activities of immune cells, satellite cells,  
83 fibroblasts and other resident muscle cells and is controlled by the muscle  
84 microenvironment. The sequential steps in the repair pathway are transient and well-  
85 orchestrated in normal muscle and tissue homeostasis is generally restored; however, in  
86 muscular dystrophy the tissue damage is chronic, inflammatory cells and fibroblasts are  
87 continually activated, and satellite cells are less able to proliferate and differentiate to  
88 repair the muscle. Adipocytes infiltrate the fibrotic regions compounding the muscle  
89 pathology. DMD is associated with chronic inflammation and drugs that reduce  
90 inflammation are likely to be beneficial(13-15).

91

92 The mouse *mdx* mutation arose spontaneously and is a single base substitution that  
93 introduces a premature stop codon in exon 26 of the dystrophin gene (*Dmd*)(16). The *mdx*  
94 mouse has no detectable dystrophin protein at the sarcolemma. The phenotype of the *mdx*  
95 mouse has been reported in numerous papers and reviews (17-19), so is only briefly  
96 reviewed here. Serum creatine kinase increases from around 1 week indicating muscle  
97 membrane leakiness, and there is acute onset of myofibre necrosis at 3 weeks identified by  
98 the presence of inflammatory cells and degenerating myofibres. Satellite cells (resident  
99 muscle progenitor cells) are activated to regenerate the muscle; the newly formed  
100 myofibres have centrally located nuclei, rather than peripheral nuclei as in undamaged  
101 myofibres. Adult *mdx* mice have a reduced but persistent level of chronic damage and  
102 regeneration and the muscle is replaced by ECM (fibrosis) and fatty deposits.

103

104 Benfotiamine is a thiamine (vitamin B1) analogue that influences multiple cellular pathways  
105 including inhibiting the formation of advanced glycation end products in diabetes (20),  
106 reducing inflammation (21), reducing oxidative stress (22) and activating the Akt pathway in  
107 heart, endothelial cells and skeletal muscle in diabetic mice (23-26). Benfotiamine is lipid-  
108 soluble and can pass through the cell membrane before being converted to biologically  
109 active thiamine, increasing levels of thiamine derivatives in the blood and liver, but not in

110 the brain (20, 27-29). Previous research has focused on benfotiamine as a therapeutic for a  
111 variety of diabetic related complications including cardiomyopathy (23, 24), retinopathy  
112 (30), limb ischaemia (26) and nephropathy (30, 31). It has an excellent safety profile in  
113 humans and has been used in many clinical trials without adverse side effects (32-35) .  
114 Because benfotiamine treatment addresses many of the symptoms associated with  
115 muscular dystrophy, we tested benfotiamine treatment in the *mdx* mouse model of  
116 Duchenne muscular dystrophy

117

118 The current study demonstrates that benfotiamine reduced multiple measures of dystrophic  
119 pathology and improved muscle function and performance in the dystrophic *mdx* mouse.  
120 Our data suggests these effects could be mediated by reducing inflammation. Due to its  
121 excellent safety profile and use in clinical trials for other diseases (31, 32, 36-38),  
122 benfotiamine could be transitioned rapidly into a clinical setting, providing benefit to many  
123 DMD patients.

124

125 **Materials and Methods:**

126 All reagents were purchased from Sigma Aldrich (Castle Hill, New South Wales, Australia)  
127 unless otherwise specified.

128

129 **Animals:**

130 All animal experiments were approved by the University of Melbourne Animal Ethics  
131 Committee (AEC) and the Murdoch Children's Research Institute AEC. Mice were purchased  
132 from The Animal Resources Centre (Perth, Western Australia) and cared for according to the  
133 'Australian Code of Practice for the Care of Animals for Scientific Purposes' published by the  
134 National Health and Medical Research Council (NHMRC) Australia (39). They were housed  
135 under a 12 hour light/dark cycle with food and water provided *ad libitum*.

136

137 **Trial design:**

138 Male *mdx* mice were fed a control chow diet, or a diet designed to deliver benfotiamine  
139 (Sigma Aldrich) at 10mg/kg bodyweight/day (prepared by Specialty Feeds, Glen Forrest,  
140 Western Australia) from 4 weeks of age for 12 weeks. At 10 weeks half the mice, control and  
141 benfotiamine treated, were placed into individual cages and allowed access to an exercise  
142 wheel; activity was recorded as rotation of the wheel every 1 minute as we have described  
143 previously(40). On completion of the trial the mice were anaesthetized with isoflurane,  
144 blood was obtained via cardiac puncture and the mice were humanely euthanised via  
145 cervical dislocation. Skeletal muscles were harvested and either snap frozen in liquid  
146 nitrogen and stored at -80°C for RNA or protein extraction or mounted in 5% tragacanth  
147 (w/v) and frozen in liquid nitrogen cooled isopentane and stored at -80°C for histological  
148 analyses.

149

150 **Immunohistochemistry:**

151 Transverse muscle cryosections (10µm) were brought to room temperature and rehydrated  
152 in 1xPBS. For immunohistochemical analysis of fibre size, transverse sections were stained  
153 for laminin-α2 as follows. Sections were blocked in 10% (v/v) donkey serum (Millipore,  
154 Billerica, Massachusetts, USA) in wash buffer (0.1%Tween, 0.5%BSA in 1xPBS) for one hour,  
155 and then incubated with the primary antibody, laminin-α2 (Santa Cruz Biotechnology,  
156 1:200), diluted in wash buffer overnight at 4°C. The sections were washed in wash buffer

157 and then incubated with the fluorescent secondary antibody, donkey anti-rat IgG Alexa  
158 Fluor 594 (Life Technologies, 1:250) in the dark for 90 minutes. Following a final wash with  
159 wash buffer, nuclei were stained with 1 $\mu$ g/ $\mu$ l Hoechst (Life Technologies) in 1xPBS for one  
160 minute before mounting with polyvinyl alcohol with glass coverslips. Sections were imaged  
161 on a Zeiss Axio Imager M1 upright fluorescent microscope with an AxioCam MRm camera  
162 running AxioVision software V4.8.2.0.

163

164 For immunohistochemical staining of utrophin associated sarcolemmal proteins the  
165 following procedure was used. Avidin/biotin blocking kit (SP-2001; Vector Laboratories) was  
166 used according to manufacturer's instructions. Primary antibodies were prepared using the  
167 Mouse on Mouse blocking kit (BMK-2202; Vector Laboratories). Sections were incubated in  
168 primary antibody in PBS at 4 $^{\circ}$ C overnight with the following antibodies or lectins: utrophin  
169 (MANCHO3; 1:5; Developmental Studies Hybridoma Bank),  $\alpha$ -DG (IIH6, sc-53987; 1:500;  
170 Santa Cruz Biotechnology),  $\beta$ -DG (VP-B205; 1:50; Vector Laboratories),  $\alpha$ -SG (VP-A105; 1:30;  
171 Vector Laboratories),  $\beta$ -SG (VP-B206; 1:30; Vector Laboratories),  $\gamma$ -SG (VP-G803, 1:100;  
172 Vector Labs), SSPN (E-2; 1:100; Santa Cruz Biotechnology), and WFA (B-1355; 1:500; Vector  
173 Laboratories). Primary antibodies were detected with a biotinylated anti-mouse IgG  
174 antibody (BA-9200; 1:500; Vector Laboratories). Fluorescein-conjugated avidin D (A-2001;  
175 1:500; Vector Laboratories) was used to detect secondary antibodies and biotinylated WFA.  
176 Sections were mounted in Vectashield (Vector Laboratories) and visualized using an  
177 Axioplan 2 fluorescence microscope with Axiovision 3.0 software (Zeiss). Images were  
178 captured under identical conditions.

179

#### 180 **Histology:**

181 Hematoxylin and eosin (H&E) staining was used to visualise the structure of the muscle  
182 myofibres, nuclei and connective tissue. Entire H&E stained sections were imaged on a  
183 Mirax Scan bright field automated digital slide Scanner (Carl Zeiss, Oberkochen, Germany) at  
184 the University of Melbourne Department of Anatomy and Neuroscience ([http://www.apn-  
185 histopathology.unimelb.edu.au/](http://www.apn-histopathology.unimelb.edu.au/)).

186

#### 187 **Measurements of pathology:**

188 Images were analysed using Image J version 1.48G (U. S. National Institutes of Health,  
189 Bethesda, Maryland, USA). Myofibre diameter was measured as Minimum Feret's diameter  
190 from laminin- $\alpha$ 2 stained transverse sections as per Treat NMD guidelines ([http://www.treat-](http://www.treat-nmd.eu/downloads/file/sops/dmd/MDX/DMD_M.1.2.001.pdf)  
191 [nmd.eu/downloads/file/sops/dmd/MDX/DMD\\_M.1.2.001.pdf](http://www.treat-nmd.eu/downloads/file/sops/dmd/MDX/DMD_M.1.2.001.pdf)). Damaged myofibres were  
192 detected using IgG staining, and the percentage of IgG positive myofibres from the entire  
193 quadriceps cross section was calculated. Areas of damaged tissue were defined based on  
194 the presence of infiltrating inflammatory cells and areas of degenerating myofibres with  
195 fragmented sarcoplasm by hematoxylin and eosin staining as per the Treat-NMD standard  
196 operating procedure ([http://www.treat-](http://www.treat-nmd.eu/downloads/file/sops/dmd/MDX/DMD_M.1.2.007.pdf)  
197 [nmd.eu/downloads/file/sops/dmd/MDX/DMD\\_M.1.2.007.pdf](http://www.treat-nmd.eu/downloads/file/sops/dmd/MDX/DMD_M.1.2.007.pdf)). The extent of tissue damage  
198 was expressed as a percentage of the total quadriceps area. Central nucleation was  
199 expressed as the percentage of centrally nucleated myofibres over the total muscle cross-  
200 section.

201

#### 202 **Creatine kinase assay:**

203 Blood obtained from cardiac puncture was centrifuged at 12,000g for 15 minutes to  
204 separate the serum from the other components. Serum was aliquoted into sterile tubes and  
205 stored at -80°C until required. The cell lysates were thawed and 5 $\mu$ l of each lysate was  
206 mixed in triplicate with 100 $\mu$ l of CK-NAC (Thermo Scientific, Waltham, Massachusetts, USA).  
207 The change in absorbance was recorded at 340nm over three minutes (measured in 20  
208 second intervals) at 37°C using a Paradigm Detection Platform (Beckman Coulter, Brea,  
209 California, USA).

210

#### 211 **RNA extraction, cDNA synthesis and qPCR:**

212 RNA was extracted with TriReagent (Sigma Aldrich) followed by purification and DNase  
213 treatment using the SV Total RNA Isolation System (Promega). cDNA was synthesised from  
214 1 $\mu$ g total cellular RNA with MML-V Reverse Transcriptase (Promega). Gene expression was  
215 quantitated using qPCR as previously described (41).

216

217 Oligonucleotide sequences are presented in Table 1. Primers were designed using 'Primer-  
218 BLAST' available on the website <http://www.ncbi.nlm.nih.gov>, Primers were tested for  
219 efficiency by serial dilution of cDNAs. All primers had an efficiency between 1.8 and 2.2 per



220 cycle. Data are expressed as the mean of normalised expression to the housekeeper  
221 hypoxanthine-guanine phosphoribosyltransferase (*Hprt*) (41).

222

### 223 **Immunoblots**

224 Protein was extracted from frozen *quadriceps* muscles by homogenization in ice cold  
225 extraction protein extraction buffer (1% NP40 alternative, 1mM EDTA, Complete EDTA-free  
226 protease inhibitor tablets and PhosSTOP Phosphatase Inhibitor Cocktail Tablets (Roche) in  
227 1xPBS). Protein concentrations were determined using a 2D quant assay (GE Healthcare  
228 BioSciences). Protein samples (100µg) were resolved through 4-12% gradient SDS-PAGE (Life  
229 Technologies) and transferred to nitrocellulose membranes. The membranes were probed  
230 with antibodies to the following proteins,: Akt (Cell Signalling Technologies), phosphorylated  
231 Akt Ser 473 (Cell Signalling Technologies),  $\alpha$ -tubulin (Sigma Aldrich), followed by HRP-  
232 conjugated anti-mouse IgG (Cell Signalling Technologies). Detected was performed using  
233 Amersham ECL Western Blotting reagents and relative protein levels were quantitated using  
234 an ImageQuant LAS400 and Image Quant TL 7.0 software (GE Healthcare and BioSciences).

235

### 236 **Forelimb grip strength measurements:**

237 Forelimb grip strength was measured weekly from 4 weeks of age using a BIO-GS3 grip  
238 strength meter (Bioseb In Vivo Research Instruments). The procedure was performed as per  
239 the Treat-NMD standard operating procedure ([http://www.treat-  
240 nmd.eu/downloads/file/sops/sma/SMA\\_M.2.1.002.pdf](http://www.treat-nmd.eu/downloads/file/sops/sma/SMA_M.2.1.002.pdf)). The force of the pull (N) prior to  
241 release was recorded and the mouse was placed back in its cage and allowed to recover for  
242 5-9 minutes before repeating the test another 4 times.

243

### 244 **Statistical analyses:**

245 Where there was a direct comparison between two groups or two data points, a Student's t-  
246 test was used to compare the mean and standard error of the data. The statistical package  
247 Genstat (14th Edition) was used to compare multiple groups. A one-way analysis of variance  
248 (ANOVA), with Dunnet's or Bonferroni post-hoc test was used when all treatments were  
249 compared to a single control or all treatments compared to each other respectively. Analysis  
250 that included time as a variable, grip strength, was conducted using a two-way ANOVA .

251 qPCR data was assessed using a non-parametric Mann-Whitney U test in GraphPad as  
252 described in Pfaffl (42).  
253

254 **Results:**

255

256 ***Benfotiamine increases growth and promotes myofibre hypertrophy in mdx mice.***

257 Body weights of the three experimental groups, benfotiamine treated *mdx*, control *mdx* and  
258 wild type were compared over the treatment period (Figure 1A). Benfotiamine treated *mdx*  
259 mice were heavier than control *mdx* mice in the initial three weeks of treatment (ages 4 to 7  
260 weeks) corresponding to the period of rapid growth. Body weights did not differ between  
261 groups during the middle phases of the treatment period. In the last 2 weeks bodyweights  
262 were similar in control *mdx* and wild type but benfotiamine treated mice were heavier. The  
263 last two weeks were the only time when the body weight of benfotiamine treated *mdx* mice  
264 was significantly different from wild type mice. We also weighed quadriceps, tibialis  
265 anterior, gastrocnemius, extensor digitorum longus, soleus and heart muscles; when  
266 corrected for body weight, there were no significant differences between groups (data not  
267 shown).

268

269 To determine the effect of benfotiamine on muscle fibre diameter, we examined the Feret's  
270 minimal diameter of muscle fibres in the quadriceps from control and benfotiamine treated  
271 *mdx* mice Figure 1B,C. There was a significant decrease in the proportion of smaller  
272 myofibres (10-30 $\mu$ m) in the quadriceps from the benfotiamine treated *mdx* mice (Figure 1D)  
273 ( $p < 0.05$ ). Conversely, there were more larger myofibres (70-80 $\mu$ m) in the *mdx* benfotiamine  
274 treated quadriceps (Figure 1D)( $p < 0.05$ ).

275

276 ***Benfotiamine reduces markers of dystrophic pathology***

277 Dystrophic pathology in patients and *mdx* mice is characterised by elevated serum creatine  
278 kinase, myofibre degeneration, immune cell infiltration and replacement of muscle with  
279 connective tissue. Transverse *quadriceps* sections were stained with IgG to mark myofibres  
280 with compromised sarcolemmal integrity (Figure 2A and B). The percentage of IgG positive  
281 myofibres was reduced in the *quadriceps* of benfotiamine treated *mdx* mice when  
282 compared to the *mdx* mice on the control diet (( $p < 0.05$ ) Figure 2C). Skeletal muscle damage  
283 – areas with infiltrating inflammatory cells and degenerating myofibres - was reduced by  
284 approximately 48% in benfotiamine treated *mdx* mice, when compared to the *mdx* mice on

285 the control diet (( $p < 0.05$ ) Figure 2D). Serum creatine kinase (CK), indicative of  
286 “leaky”/damaged muscle fibres, was reduced by around 34% in benfotiamine treated *mdx*  
287 compared to control *mdx* mice ( $p = 0.073$ ) (Figure 2E).

288

289 The reduction in dystrophic pathology seen with benfotiamine administration could occur  
290 by promoting growth of new myofibres, or by preventing skeletal muscle damage. To  
291 investigate these mechanisms the percentage of fibres with central nucleation was  
292 measured over the quadriceps cross section. In healthy muscle, the nuclei are located  
293 peripherally, beneath the basal lamina, but the nuclei of regenerated muscle fibres are  
294 centrally located . Benfotiamine administration significantly reduced the percentage of  
295 myofibres with centrally located nuclei in the *mdx* quadriceps (( $p < 0.05$ ), Figure 2F). This  
296 finding suggests that the primary effect of benfotiamine is to protect the muscle from  
297 damage rather than to increase regeneration.

298

#### 299 ***Forelimb grip strength is increased in benfotiamine treated mdx mice.***

300 To determine if the reduced dystrophic pathology observed with benfotiamine treatment  
301 translates to functional improvements in strength and performance, forelimb grip strength  
302 was measured. Wildtype mice were consistently stronger (61-107%) than *mdx* mice on the  
303 control and benfotiamine diets across the entire treatment period (Figure 3A). Benfotiamine  
304 treated *mdx* mice were stronger than the *mdx* control cohort from 4 weeks of treatment  
305 ( $p < 0.01$ ) until trial completion ( $p < 0.0001$ ) (Figure 3A). .

306

307 At the end of the trial, grip strength was increased in the benfotiamine treated *mdx* group  
308 compared to control *mdx* mice (( $p < 0.001$ ), Figure 3B), but had not reached wild type levels.  
309 These data reveal that benfotiamine is an effective treatment to reduce pathology and  
310 improve muscle function in *mdx* mice.

311

#### 312 **Benfotiamine treatment improves voluntary exercise performance.**

313 Voluntary exercise was recorded during the last two weeks of the trial and exercise  
314 parameters including the running time and distance and speed, rest time, and the number  
315 of run bouts were calculated (Figure 4). Overall benfotiamine treated *mdx* mice ran further  
316 and faster than their control counterparts. The daily mean distance was increased compared

317 to controls ( $p < 0.05$ ) as was the total distance that treated mice ran over the trial period  
318 (Figure 4A). There was no difference in the mean rest time between groups (Figure 4B);  
319 benfotiamine treated *mdx* rested for a shorter time in total indicating that they rested less  
320 often. There was no difference between the treatment groups in the number of run bouts  
321 (Figure 4C), but benfotiamine treated mice ran for longer (Figure 4D) and covered more  
322 distance per exercise bout ( $p < 0.05$ ) (Figure 4E). The rate at which benfotiamine treated mice  
323 ran was higher than controls ( $p < 0.05$ ) (Figure 4F). There was no difference in the maximum  
324 run rate (maximum speed) with benfotiamine treatment (not shown).

325

### 326 ***Benfotiamine treatment increases compensatory cell-matrix adhesion complexes.***

327 Protection from myofibre damage in dystrophic skeletal muscle has been associated with  
328 increased expression of adhesion complexes, including components of the utrophin  
329 glycoprotein complex (UGC) and  $\alpha 7 \beta 1$  integrin, which is thought to compensate for the lack  
330 of dystrophin (43, 44). During fetal development, utrophin is found around the entire  
331 sarcolemma of developing myofibres; however, in adult skeletal muscle utrophin is  
332 restricted to the post-synaptic region of the neuromuscular junction (45, 46). Increased  
333 utrophin compensates for dystrophin loss, and associates with  $\beta$ -dystroglycan. In turn, this  
334 is further stabilized by the sarcoglycan-sarcospan sub-complex (consisting of  $\alpha$ -,  $\beta$ -  $\gamma$ - and  $\delta$ -  
335 sarcoglycan)(44). Given the histopathological improvements in benfotiamine-treated *mdx*  
336 tissue, we examined the abundance and distribution of utrophin and associated UGC  
337 proteins. Expression of utrophin (*Utr*) was not increased with benfotiamine (not shown);  
338 however, immunohistochemistry demonstrated that benfotiamine treatment increased  
339 UGC protein staining at the sarcolemma in *mdx* muscle (Figure 5).

340

### 341 **Benfotiamine does not activate Akt signaling in *mdx* skeletal muscle**

342 *Akt* and *mTOR* mRNAs were significantly up regulated in muscle from *mdx* mice fed the  
343 benfotiamine diet (data not shown); however, total Akt protein expression was not changed  
344 by benfotiamine, and the proportion of phosphorylated Akt (the active form; p-Akt)  
345 following benfotiamine treatment was not increased (data not shown). Levels of mTOR and  
346 phosphorylated mTOR were also not changed in muscle from treated mice (not shown).

347

### 348 **Benfotiamine reduces gene expression of inflammatory markers**

349 Dystrophic pathology progression is associated with chronic inflammation that disrupts  
350 normal homeostasis and exacerbates pathology by up-regulating inflammatory cytokines,  
351 chemokines and immune cells (47-51). To determine if benfotiamine has anti-inflammatory  
352 effects in the context of *mdx* skeletal muscle, we analysed the relative gene expression of  
353 macrophage markers and pro-inflammatory cytokines. Expression of the pan-macrophage  
354 marker *Emr1* was downregulated with benfotiamine treatment in the *mdx* mice ( $p < 0.05$ )  
355 (Figure 6A). *Cd86* (a marker of cytotoxic M1 macrophages) was also down-regulated  
356 ( $p < 0.05$ ) (Figure 6B) but *Cd163* mRNA (M2 macrophages) was unchanged with benfotiamine  
357 treatment (not shown). The pro-inflammatory cytokines, *Tnf* and *Il1b*, were reduced in the  
358 *mdx* mice with benfotiamine treatment when compared to the control *mdx* mice ( $p < 0.05$ )  
359 (Figure 6C and D); however, *Il6* and *Il10* mRNAs were unchanged (Figure 6E and F).

360

361 Previous transcript profiling studies and our own unpublished data showed altered  
362 expression of pathways involved in the inflammatory/immune response in *mdx* mice(52-54)  
363 . Based on these studies, we examined expression of a number of inflammatory genes that  
364 have previously been reported as the most relevant differentially expressed genes; *Mmp12*,  
365 *Gpnmb*, *Postn*, *Mpeg1*, *Lgals3*, *Itgb2* and *Spp1* (Figure 7A-G). Of these genes, only *Itgpb2*  
366 expression was not affected by benfotiamine treatment. *Spp1*, *Postn*, and *Col1a1* are all  
367 strongly up-regulated in dystrophic skeletal muscle and are down-regulated with  
368 benfotiamine treatment (Figure 7C, G and H).

369

370

371 **Discussion:**

372

373 In this study, we have shown that benfotiamine, a lipid soluble analogue of vitamin B1,  
374 reduces multiple measures of dystrophic pathology and improves muscle strength and  
375 performance in *mdx* mice. The histopathological changes associated with disease  
376 progression in DMD include many fibres with central nucleation, wider variation in fibre  
377 diameter, extensive necrosis, chronic inflammation, fat deposition and tissue fibrosis (13,  
378 55, 56). The progressive accumulation of collagen and related ECM proteins and the  
379 apparent dysregulation of matricellular proteins are believed to play an important role in  
380 DMD, with the progressive loss of muscle fibres and their replacement with non-contractile  
381 fibrotic tissue being a major histopathological hallmark that correlates with reduced motor  
382 function (57). In fact, the excessive accumulation of ECM components is an indicator of the  
383 decline in muscle strength (58).

384

385 We originally hypothesised that benfotiamine treatment would increase phosphorylation of  
386 the components of the AKT signalling pathway and this in turn would increase utrophin  
387 expression resulting in protection from damage(43). Benfotiamine clearly protects *mdx*  
388 skeletal muscle from damage, but we did not see any significant effect on the AKT signalling  
389 axis. Utrophin expression is increased in *mdx* muscles (45, 59) and is more abundant around  
390 the sarcolemma of regenerating fibres than in mature fibres (60). In situations where  
391 utrophin is upregulated through transgenic or pharmacological means, dystrophic muscle  
392 fibres are protected from damage (61, 62). While we do not observe utrophin upregulation  
393 at the transcript level in response to benfotiamine, we do find evidence of increased  
394 localisation of utrophin around muscle fibres.

395

396 Inflammation is a major contributor to disease progression in DMD and one of the major  
397 components of this response is the infiltration and activity of macrophage populations. We  
398 show a decrease in both the pan macrophage marker *Emr1* and the M1 macrophage marker  
399 *Cd86* in benfotiamine treated muscle and a decrease in pro-inflammatory *Tnf* and *Il1b* gene  
400 expression. We also provide evidence for the down regulation of other genes associated  
401 with macrophage activity and function.

402

403 MMP12, often referred to as macrophage elastase, is primarily produced by macrophages  
404 and is associated with a number of pathological conditions including aortic aneurism,  
405 atherosclerosis, emphysema and rheumatoid arthritis (63). MMP12 activity is elevated  
406 during ECM remodelling but it also cleaves non-ECM targets such as latent TNF (64). As well  
407 as activating TNF, it has pro-inflammatory activity that can recruit neutrophils and increase  
408 cytokine and chemokine production. MMP12 can cleave and activate chemokines such as  
409 mCXCL5, hCXCL5, and hCXCL8 which are involved in recruiting neutrophils. Macrophages  
410 accumulate at injury sites after 24-48 hours and secrete MMP12 to inactivate these same  
411 chemokines and contribute to the reduction in neutrophils at the site of damage. MMP12  
412 can also inactivate CCL2, -7, -8, and -13 further assisting to resolve the inflammation (63).

413

414 A number of transcriptomic studies have examined the gene expression patterns that  
415 underlie DMD progression. The method of analysis used to identify dysregulated pathways  
416 is not consistent between these studies (65) but a common theme is a chronic inflammatory  
417 response(54) . Clusters of genes which contribute to progression including *Spp1*, *Itgbp2*,  
418 *Mpeg1*, *Postn*, *Igals3*, *Gpnmb* and *Mmp12*(53) are also often upregulated. Interestingly  
419 studies that show protection from damage in *mdx* muscles mediated by increased utrophin  
420 staining at the sarcolemma also report an effect on this gene network (52). Benfotiamine  
421 treatment of *mdx* mice resulted in down regulation of all these genes, except *Itgb2*, that  
422 have previously been associated with disease progression. The changes we report here in  
423 gene expression after benfotiamine treatment are consistent with previous studies, some in  
424 other tissue systems, which indicate a dampening of the pro-inflammatory response.  
425 Glycoprotein nonmetastatic melanoma protein B (GPNMB) is involved in inflammation and  
426 fibrosis after tissue injury. The expression of *Gpnmb* has been associated with increased  
427 damage in *mdx* muscle (66) and there is significant evidence that GPNMB is associated with  
428 inflammatory disease of cardiac muscle. GPNMB adversely influences myocardial  
429 remodelling(67) and *Mmp12* and *Gpnmb* expression have been associated with  
430 inflammatory processes associated with myocarditis(68).

431

432 Osteopontin (*Spp1*) is a matricellular protein that is increased along with periostin (*Pstn*) in  
433 muscular dystrophy (53, 54, 69, 70). Osteopontin is highly expressed in dystrophic muscle,



434 (71) is associated with the inflammatory infiltrate during regeneration and is closely linked  
435 to fibrosis in skeletal muscle (72). In osteopontin and dystrophin double knockout mice, this  
436 matricellular protein acts as an immune-modulator in skeletal muscle and a pro-fibrotic  
437 cytokine in muscular dystrophy (73). Dysregulation of both osteopontin and periostin is an  
438 early feature in laminin-deficient muscular dystrophy (74, 75); indicating that changed levels  
439 of both these matricellular proteins are key factors involved in development of muscular  
440 dystrophy related fibrosis(76). These studies clearly establish matricellular proteins as  
441 promising therapeutic targets for reducing fibrosis in muscular dystrophy. Agents such as  
442 benfotiamine which correct secondary abnormalities in ECM protein expression, including  
443 matricellular proteins, could reduce scar tissue accumulation, and maintain skeletal muscle  
444 elasticity and function.

445

446 Fibrosis is pronounced in DMD and the *mdx* mouse model, and is a major contributor to  
447 muscle dysfunction and disability. The *mdx* mouse shows varying degrees of fibrosis (77, 78)  
448 with increased collagen and proteoglycan expression seen in dystrophin deficient muscle  
449 including the limb muscles and the diaphragm (79-81). A recent proteomic characterisation  
450 of the diaphragm in *mdx-4cv*, an *mdx* genetic variant which shows decreased revertant  
451 fibres, showed that the most significantly increased protein was the matricellular protein  
452 periostin (82); this confirms a previous study which showed increased periostin transcript in  
453 limb muscles of the same mouse model (83). These studies are in keeping with observations  
454 of increased periostin in DMD biopsy material (84). There is a close link between  
455 inflammatory signalling, through IL-17, periostin expression and fibrotic effects as  
456 exemplified by observations that IL-17 and TNF exert a synergistic effect on the increased  
457 expression of type 1 collagen in liver fibrosis (85). Periostin ablation in mice reduces the  
458 dystrophic symptoms(84). While we did not directly examine fibrosis in this study there are  
459 a number of robust changes in gene expression which suggest that benfotiamine could be  
460 reducing fibrosis; *Spp1*, *Pstn*, and *Col1a1* are all downregulated following benfotiamine  
461 treatment.

462

463 This is the first study to assess the potential of benfotiamine as a treatment for  
464 neuromuscular conditions such as DMD. Further studies can assess whether benfotiamine  
465 would provide additive benefits when used with corticosteroids. With many promising

466 treatments for DMD still in development, future studies could allow benfotiamine, with its  
467 excellent safety profile and encouraging results in the *mdx* mouse model, to rapidly  
468 transition into the clinic, providing benefit to many DMD patients in the interim.  
469

470

471 **Acknowledgements:**

472 This work was supported by Muscular Dystrophy Australia, Murdoch Children's Research  
473 Institute and the Victorian Government's Operational Infrastructure Support Program. This  
474 work was supported by grants from the National Institutes of Health [R01 AR048179 to  
475 R.C.W, T32 AR059033 and F32 AR069469 to E.M.G] and the Muscular Dystrophy Association  
476 USA [274143 and 416364 to R.C.W.]. SRL was supported by a National Health and Medical  
477 Research Council of Australia research fellowship [GNT1043837].

478

479

480

481 **Figure 1. Benfotiamine increases *mdx* body weight and quadriceps myofibre diameter .**

482 (A) Mice were weighed weekly for the 12 weeks of the trial. Benfotiamine treated *mdx* mice  
483 weighed more than the *mdx* control cohort from 5-7 weeks of age, then from 17-19 weeks  
484 of age. Benfotiamine treated *mdx* mice were similar in weight to wild type mice across the  
485 entire treatment period. The quadriceps muscle from control (B) and benfotiamine treated  
486 (C) *mdx* mice were stained with a laminin  $\alpha 2$  antibody (red) and DAPI (blue). Benfotiamine  
487 increased the quadriceps cross sectional area by increasing the number of larger ( $>70\mu\text{m}$   
488 diameter) myofibres and decreasing the number of smaller ( $<40\mu\text{m}$  diameter) myofibres  
489 (D). The graphs show mean  $\pm$  s.e.m. \* indicates  $p<0.05$  (benfotiamine compared to *mdx*  
490 control),  $n=6$ . Scale bar,  $200\ \mu\text{M}$ .

491

492 **Figure 2. Benfotiamine reduces muscle damage and improves sarcolemma stability in *mdx***

493 **mice.** Transverse quadriceps cryosections from *mdx* mice on control diet (A) or  
494 benfotiamine (B) co-stained with antibodies to laminin  $\alpha 2$  antibody (red) and IgG (green).  
495 Nuclei are stained with DAPI (blue). Benfotiamine significantly reduced the percentage of  
496 damaged myofibres permeable to IgG (C). Benfotiamine reduces the area of damage  
497 (including areas of necrosis and inflammatory cell infiltration) observed in H&E stained  
498 transverse sections compared to *mdx* mice on a control diet (D). Muscle-specific creatine  
499 kinase in the serum, a marker of sarcolemma damage, is reduced with benfotiamine  
500 treatment (E). Benfotiamine also reduces the proportion of fibres in *mdx* skeletal muscle  
501 with central nucleation (F). \* $p<0.05$ , \*\* $p<0.001$ ,  $n=6$ . Scale bar,  $200\ \mu\text{M}$ .

502

503 **Figure 3. Benfotiamine increases grip strength in *mdx* mice.** (A) Forelimb grip strength was

504 measured in benfotiamine treated, control *mdx* and wild type mice on a weekly basis. Wild  
505 type mice were stronger than both *mdx* groups throughout the trial ( $p<0.0001$  with two-way  
506 ANOVA). After 4 weeks of treatment grip strength was significantly increased in  
507 benfotiamine treated *mdx* mice compared to *mdx* controls; this difference was maintained  
508 till the end of the trial. (B) At the completion of the treatment grip strength in benfotiamine  
509 treated *mdx* mice was significantly improved but did not reach wild type levels. Grip  
510 strength was normalised to bodyweight. \*\* $p<0.01$ , \*\*\* $p<0.001$ , \*\*\*\* $p<0.0001$  indicates

511 differences between mdx mice on control and benfotiamine diets, n=6. Graphs show mean  
512  $\pm$  SEM. (n=6).

513

514 **Figure 4. Benfotiamine improves voluntary exercise performance.**

515 For the final 2 weeks of the trial mice were allowed access to an exercise wheel. A number  
516 of parameters were recorded or calculated to examine the effect of benfotiamine on  
517 exercise performance. Benfotiamine treated mice ran further each day (A) but rested for  
518 similar periods of time (B) and ran on the exercise wheel a similar number of times each day  
519 (C). Benfotiamine treated mice ran for a longer period of time (D), covered a greater  
520 distance each time they ran (E) and ran at a faster rate (F) than did control mice. The graphs  
521 show mean  $\pm$  s.e.m. \* indicates  $p < 0.05$ , n=6. Scale bar.

522

523 **Figure 5. Benfotiamine treatment increases localisation of utrophin-glycoprotein complex**

524 **to the sarcolemma.** Immunofluorescence analysis of benfotiamine treated and control *mdx*  
525 quadriceps reveals an increased abundance of utrophin-glycoprotein complex at the  
526 sarcolemma. Utrophin (utrn),  $\alpha$ -/ $\beta$ -dystroglycan ( $\alpha$ -/ $\beta$ -DG),  $\alpha$ -/ $\gamma$ -/ $\beta$ -sarcoglycan ( $\alpha$ -/ $\gamma$ -/ $\beta$ -  
527 SG), sarcospan (SSPN) are shown. Bottom panels are stained with wheat germ agglutinin  
528 (WFA) to define the sarcolemma. Scale bar, 50  $\mu$ m.

529

530 **Figure 6. Benfotiamine administration down-regulates expression of pro-inflammatory**

531 **cytokines and markers of macrophages in treated *mdx* mice.** The pan macrophage marker  
532 *Emr1* (A) and M1 macrophage marker *Cd86* (B) mRNAs were down-regulated with  
533 benfotiamine administration compared to *mdx* controls. *Cd163* (a marker for M2  
534 macrophages) expression was unchanged (not shown). *Tnf* (C) and *IL1b* (D) mRNAs are  
535 down-regulated, and both *Il6* (E) and *Il10* (F) are unchanged with benfotiamine treatment.  
536 Graphs show mean  $\pm$ SEM. \* indicates  $p < 0.05$  (n=5-7).

537

538 **Figure 7. Expression of genes associated with inflammatory responses and fibrosis are**

539 **reduced by benfotiamine treated in *mdx* mice.** *Mmp12* (A), *Gpnmb* (B), *Postn* (C), *Mpeg1*

540 (D) and *Lgals3* (E) mRNAs were all down regulated by benfotiamine treatment. *Itgb2* (F)  
541 expression was decreased following treatment but this was not significant (P=0.073). *Spp1*  
542 (G) and *Col1a1* (H) mRNAs were also decreased compared to controls in *mdx* muscle  
543 following treatment. Graphs show mean  $\pm$ SEM. \* indicates  $p < 0.05$  \*\* indicates  $P < 0.01$  (n=5-  
544 7).  
545

546

547 **References**

- 548 1 Mendell, J.R., Shilling, C., Leslie, N.D., Flanigan, K.M., al-Dahhak, R., Gastier-Foster, J.,  
549 Kneile, K., Dunn, D.M., Duval, B., Aoyagi, A. *et al.* (2012) Evidence-based path to newborn  
550 screening for Duchenne muscular dystrophy. *Annals of neurology*, **71**, 304-313.
- 551 2 Hoffman, E.P., Brown, R.H., Jr. and Kunkel, L.M. (1987) Dystrophin: the protein  
552 product of the Duchenne muscular dystrophy locus. *Cell*, **51**, 919-928.
- 553 3 Campbell, K.P. and Kahl, S.D. (1989) Association of dystrophin and an integral  
554 membrane glycoprotein. *Nature*, **338**, 259-262.
- 555 4 Ohlendieck, K., Ervasti, J.M., Snook, J.B. and Campbell, K.P. (1991) Dystrophin-  
556 glycoprotein complex is highly enriched in isolated skeletal muscle sarcolemma. *The Journal*  
557 *of cell biology*, **112**, 135-148.
- 558 5 Prins, K.W., Humston, J.L., Mehta, A., Tate, V., Ralston, E. and Ervasti, J.M. (2009)  
559 Dystrophin is a microtubule-associated protein. *The Journal of cell biology*, **186**, 363-369.
- 560 6 Rando, T.A. (2001) The dystrophin-glycoprotein complex, cellular signaling, and the  
561 regulation of cell survival in the muscular dystrophies. *Muscle & nerve*, **24**, 1575-1594.
- 562 7 Price, F.D., Kuroda, K. and Rudnicki, M.A. (2007) Stem cell based therapies to treat  
563 muscular dystrophy. *Biochimica et biophysica acta*, **1772**, 272-283.
- 564 8 Shin, J., Tajrishi, M.M., Ogura, Y. and Kumar, A. (2013) Wasting mechanisms in  
565 muscular dystrophy. *The international journal of biochemistry & cell biology*, **45**, 2266-2279.
- 566 9 Tidball, J.G. (2005) Inflammatory processes in muscle injury and repair. *American*  
567 *Journal of Physiology - Regulatory Integrative & Comparative Physiology.*, **288**, R345-R353.
- 568 10 Tidball, J.G. and Villalta, S.A. (2010) Regulatory interactions between muscle and the  
569 immune system during muscle regeneration. *Am J Physiol Regul Integr Comp Physiol*, **298**,  
570 R1173-1187.
- 571 11 Villalta, S.A., Rinaldi, C., Deng, B., Liu, G., Fedor, B. and Tidball, J.G. (2011)  
572 Interleukin-10 reduces the pathology of mdx muscular dystrophy by deactivating M1  
573 macrophages and modulating macrophage phenotype. *Human molecular genetics*, **20**, 790-  
574 805.
- 575 12 Mann, C.J., Perdiguero, E., Kharraz, Y., Aguilar, S., Pessina, P., Serrano, A.L. and  
576 Munoz-Canoves, P. (2011) Aberrant repair and fibrosis development in skeletal muscle.  
577 *Skelet Muscle*, **1**, 21.
- 578 13 Bushby, K., Finkel, R., Birnkrant, D.J., Case, L.E., Clemens, P.R., Cripe, L., Kaul, A.,  
579 Kinnett, K., McDonald, C., Pandya, S. *et al.* (2010) Diagnosis and management of Duchenne  
580 muscular dystrophy, part 1: diagnosis, and pharmacological and psychosocial management.  
581 *The Lancet. Neurology*, **9**, 77-93.
- 582 14 Evans, N.P., Misyak, S.A., Robertson, J.L., Bassaganya-Riera, J. and Grange, R.W.  
583 (2009) Immune-mediated mechanisms potentially regulate the disease time-course of  
584 duchenne muscular dystrophy and provide targets for therapeutic intervention. *PM & R :*  
585 *the journal of injury, function, and rehabilitation*, **1**, 755-768.
- 586 15 Rosenberg, A.S., Puig, M., Nagaraju, K., Hoffman, E.P., Villalta, S.A., Rao, V.A.,  
587 Wakefield, L.M. and Woodcock, J. (2015) Immune-mediated pathology in Duchenne  
588 muscular dystrophy. *Science translational medicine*, **7**, 299rv294.
- 589 16 Bulfield, G., Siller, W.G., Wight, P.A. and Moore, K.J. (1984) X chromosome-linked  
590 muscular dystrophy (mdx) in the mouse. *Proceedings of the National Academy of Sciences of*  
591 *the United States of America*, **81**, 1189-1192.

- 592 17 Manning, J. and O'Malley, D. (2015) What has the mdx mouse model of Duchenne  
593 muscular dystrophy contributed to our understanding of this disease? *Journal of muscle*  
594 *research and cell motility*, **36**, 155-167.
- 595 18 McGreevy, J.W., Hakim, C.H., McIntosh, M.A. and Duan, D. (2015) Animal models of  
596 Duchenne muscular dystrophy: from basic mechanisms to gene therapy. *Disease models &*  
597 *mechanisms*, **8**, 195-213.
- 598 19 Partridge, T.A. (2013) The mdx mouse model as a surrogate for Duchenne muscular  
599 dystrophy. *The FEBS journal*, **280**, 4177-4186.
- 600 20 Balakumar, P., Rohilla, A., Krishan, P., Solairaj, P. and Thangathirupathi, A. (2010) The  
601 multifaceted therapeutic potential of benfotiamine. *Pharmacol Res*, **61**, 482-488.
- 602 21 Shoeb, M. and Ramana, K.V. (2012) Anti-inflammatory effects of benfotiamine are  
603 mediated through the regulation of the arachidonic acid pathway in macrophages. *Free*  
604 *Radic Biol Med*, **52**, 182-190.
- 605 22 Wu, S. and Ren, J. (2006) Benfotiamine alleviates diabetes-induced cerebral oxidative  
606 damage independent of advanced glycation end-product, tissue factor and TNF-alpha.  
607 *Neurosci Lett*, **394**, 158-162.
- 608 23 Katare, R., Caporali, A., Emanuelli, C. and Madeddu, P. (2010) Benfotiamine improves  
609 functional recovery of the infarcted heart via activation of pro-survival G6PD/Akt signaling  
610 pathway and modulation of neurohormonal response. *Journal of molecular and cellular*  
611 *cardiology*, **49**, 625-638.
- 612 24 Katare, R.G., Caporali, A., Oikawa, A., Meloni, M., Emanuelli, C. and Madeddu, P.  
613 (2010) Vitamin B1 analog benfotiamine prevents diabetes-induced diastolic dysfunction and  
614 heart failure through Akt/Pim-1-mediated survival pathway. *Circulation. Heart failure*, **3**,  
615 294-305.
- 616 25 Marchetti, V., Menghini, R., Rizza, S., Vivanti, A., Feccia, T., Lauro, D., Fukamizu, A.,  
617 Lauro, R. and Federici, M. (2006) Benfotiamine counteracts glucose toxicity effects on  
618 endothelial progenitor cell differentiation via Akt/FoxO signaling. *Diabetes*, **55**, 2231-2237.
- 619 26 Gadau, S., Emanuelli, C., Van Linthout, S., Graiani, G., Todaro, M., Meloni, M.,  
620 Campesi, I., Invernici, G., Spillmann, F., Ward, K. *et al.* (2006) Benfotiamine accelerates the  
621 healing of ischaemic diabetic limbs in mice through protein kinase B/Akt-mediated  
622 potentiation of angiogenesis and inhibition of apoptosis. *Diabetologia*, **49**, 405-420.
- 623 27 Bitsch, R., Wolf, M., Moller, J., Heuzeroth, L. and Gruneklee, D. (1991) Bioavailability  
624 assessment of the lipophilic benfotiamine as compared to a water-soluble thiamin  
625 derivative. *Ann Nutr Metab*, **35**, 292-296.
- 626 28 Volvert, M.L., Seyen, S., Piette, M., Evrard, B., Gangolf, M., Plumier, J.C. and  
627 Bettendorff, L. (2008) Benfotiamine, a synthetic S-acyl thiamine derivative, has different  
628 mechanisms of action and a different pharmacological profile than lipid-soluble thiamine  
629 disulfide derivatives. *BMC Pharmacol*, **8**, 10.
- 630 29 Loew, D. (1996) Pharmacokinetics of thiamine derivatives especially of benfotiamine.  
631 *Int J Clin Pharmacol Ther*, **34**, 47-50.
- 632 30 Karachalias, N., Babaei-Jadidi, R., Ahmed, N. and Thornalley, P.J. (2003)  
633 Accumulation of fructosyl-lysine and advanced glycation end products in the kidney, retina  
634 and peripheral nerve of streptozotocin-induced diabetic rats. *Biochemical Society*  
635 *transactions*, **31**, 1423-1425.
- 636 31 Schupp, N., Dette, E.M., Schmid, U., Bahner, U., Winkler, M., Heidland, A. and  
637 Stopper, H. (2008) Benfotiamine reduces genomic damage in peripheral lymphocytes of  
638 hemodialysis patients. *Naunyn-Schmiedeberg's archives of pharmacology*, **378**, 283-291.



- 639 32 Du, X., Edelstein, D. and Brownlee, M. (2008) Oral benfotiamine plus alpha-lipoic acid  
640 normalises complication-causing pathways in type 1 diabetes. *Diabetologia*, **51**, 1930-1932.
- 641 33 Garg, S., Syngle, A. and Vohra, K. (2013) Efficacy and tolerability of advanced  
642 glycation end-products inhibitor in osteoarthritis: a randomized, double-blind, placebo-  
643 controlled study. *Clin J Pain*, **29**, 717-724.
- 644 34 Stirban, A., Pop, A. and Tschoepe, D. (2013) A randomized, double-blind, crossover,  
645 placebo-controlled trial of 6 weeks benfotiamine treatment on postprandial vascular  
646 function and variables of autonomic nerve function in Type 2 diabetes. *Diabet Med*, **30**,  
647 1204-1208.
- 648 35 Stracke, H., Gaus, W., Achenbach, U., Federlin, K. and Bretzel, R.G. (2008)  
649 Benfotiamine in diabetic polyneuropathy (BENDIP): results of a randomised, double blind,  
650 placebo-controlled clinical study. *Exp Clin Endocrinol Diabetes*, **116**, 600-605.
- 651 36 Garg, S., Syngle, A. and Vohra, K. (2013) Efficacy and tolerability of advanced  
652 glycation end-products inhibitor in osteoarthritis: a randomized, double-blind, placebo-  
653 controlled study. *The Clinical journal of pain*, **29**, 717-724.
- 654 37 Stracke, H., Gaus, W., Achenbach, U., Federlin, K. and Bretzel, R.G. (2008)  
655 Benfotiamine in diabetic polyneuropathy (BENDIP): results of a randomised, double blind,  
656 placebo-controlled clinical study. *Experimental and clinical endocrinology & diabetes :  
657 official journal, German Society of Endocrinology [and] German Diabetes Association*, **116**,  
658 600-605.
- 659 38 Bitsch, R., Wolf, M., Moller, J., Heuzeroth, L. and Gruneklee, D. (1991) Bioavailability  
660 assessment of the lipophilic benfotiamine as compared to a water-soluble thiamin  
661 derivative. *Annals of nutrition & metabolism*, **35**, 292-296.
- 662 39 National Health and Medical Research Council. (2013), Canberra, Australia, in press.
- 663 40 Smythe, G.M. and White, J.D. (2011) Voluntary wheel running in dystrophin-deficient  
664 (mdx) mice: Relationships between exercise parameters and exacerbation of the dystrophic  
665 phenotype. *PLoS currents*, **3**, RRN1295.
- 666 41 Hunt, L.C., Upadhyay, A., Jazayeri, J.A., Tudor, E.M. and White, J.D. (2013) An anti-  
667 inflammatory role for leukemia inhibitory factor receptor signaling in regenerating skeletal  
668 muscle. *Histochemistry and cell biology*, **139**, 13-34.
- 669 42 Pfaffl, M. (2004) Bustin, S. (ed.), In *A-Z of quantitative PCR*. International University  
670 Line (IUL), La Jolla, California, USA, in press., pp. 88-108.
- 671 43 Peter, A.K., Ko, C.Y., Kim, M.H., Hsu, N., Ouchi, N., Rhie, S., Izumiya, Y., Zeng, L.,  
672 Walsh, K. and Crosbie, R.H. (2009) Myogenic Akt signaling upregulates the utrophin-  
673 glycoprotein complex and promotes sarcolemma stability in muscular dystrophy. *Human  
674 molecular genetics*, **18**, 318-327.
- 675 44 Blake, D.J., Tinsley, J.M. and Davies, K.E. (1996) Utrophin: a structural and functional  
676 comparison to dystrophin. *Brain pathology (Zurich, Switzerland)*, **6**, 37-47.
- 677 45 Clerk, A., Morris, G.E., Dubowitz, V., Davies, K.E. and Sewry, C.A. (1993) Dystrophin-  
678 related protein, utrophin, in normal and dystrophic human fetal skeletal muscle. *The  
679 Histochemical journal*, **25**, 554-561.
- 680 46 Lin, S. and Burgunder, J.M. (2000) Utrophin may be a precursor of dystrophin during  
681 skeletal muscle development. *Brain research. Developmental brain research*, **119**, 289-295.
- 682 47 Spencer, M.J., Montecino-Rodriguez, E., Dorshkind, K. and Tidball, J.G. (2001) Helper  
683 (CD4(+)) and cytotoxic (CD8(+)) T cells promote the pathology of dystrophin-deficient  
684 muscle. *Clinical immunology (Orlando, Fla.)*, **98**, 235-243.

- 685 48 Wehling, M., Spencer, M.J. and Tidball, J.G. (2001) A nitric oxide synthase transgene  
686 ameliorates muscular dystrophy in mdx mice. *The Journal of cell biology*, **155**, 123-131.
- 687 49 Gussoni, E., Pavlath, G.K., Miller, R.G., Panzara, M.A., Powell, M., Blau, H.M. and  
688 Steinman, L. (1994) Specific T cell receptor gene rearrangements at the site of muscle  
689 degeneration in Duchenne muscular dystrophy. *Journal of immunology (Baltimore, Md. :  
690 1950)*, **153**, 4798-4805.
- 691 50 Mantegazza, R., Andreetta, F., Bernasconi, P., Baggi, F., Oksenberg, J.R., Simoncini,  
692 O., Mora, M., Cornelio, F. and Steinman, L. (1993) Analysis of T cell receptor repertoire of  
693 muscle-infiltrating T lymphocytes in polymyositis. Restricted V alpha/beta rearrangements  
694 may indicate antigen-driven selection. *The Journal of clinical investigation*, **91**, 2880-2886.
- 695 51 Villalta, S.A., Nguyen, H.X., Deng, B., Gotoh, T. and Tidball, J.G. (2009) Shifts in  
696 macrophage phenotypes and macrophage competition for arginine metabolism affect the  
697 severity of muscle pathology in muscular dystrophy. *Human molecular genetics*, **18**, 482-  
698 496.
- 699 52 Di Certo, M.G., Corbi, N., Strimpakos, G., Onori, A., Luvisetto, S., Severini, C.,  
700 Guglielmotti, A., Batassa, E.M., Pisani, C., Floridi, A. *et al.* (2010) The artificial gene Jazz, a  
701 transcriptional regulator of utrophin, corrects the dystrophic pathology in mdx mice. *Human  
702 molecular genetics*, **19**, 752-760.
- 703 53 Marotta, M., Ruiz-Roig, C., Sarria, Y., Peiro, J.L., Nunez, F., Ceron, J., Munell, F. and  
704 Roig-Quilis, M. (2009) Muscle genome-wide expression profiling during disease evolution in  
705 mdx mice. *Physiological genomics*, **37**, 119-132.
- 706 54 Porter, J.D., Khanna, S., Kaminski, H.J., Rao, J.S., Merriam, A.P., Richmonds, C.R.,  
707 Leahy, P., Li, J., Guo, W. and Andrade, F.H. (2002) A chronic inflammatory response  
708 dominates the skeletal muscle molecular signature in dystrophin-deficient mdx mice.  
709 *Human molecular genetics*, **11**, 263-272.
- 710 55 Klingler, W., Jurkat-Rott, K., Lehmann-Horn, F. and Schleip, R. (2012) The role of  
711 fibrosis in Duchenne muscular dystrophy. *Acta myologica : myopathies and  
712 cardiomyopathies : official journal of the Mediterranean Society of Myology*, **31**, 184-195.
- 713 56 Zhou, L. and Lu, H. (2010) Targeting fibrosis in Duchenne muscular dystrophy. *Journal  
714 of neuropathology and experimental neurology*, **69**, 771-776.
- 715 57 Desguerre, I., Mayer, M., Leturcq, F., Barbet, J.P., Gherardi, R.K. and Christov, C.  
716 (2009) Endomysial fibrosis in Duchenne muscular dystrophy: a marker of poor outcome  
717 associated with macrophage alternative activation. *Journal of neuropathology and  
718 experimental neurology*, **68**, 762-773.
- 719 58 Kharraz, Y., Guerra, J., Pessina, P., Serrano, A.L. and Munoz-Canoves, P. (2014)  
720 Understanding the process of fibrosis in Duchenne muscular dystrophy. *BioMed research  
721 international*, **2014**, 965631.
- 722 59 Helliwell, T.R., Man, N.T., Morris, G.E. and Davies, K.E. (1992) The dystrophin-related  
723 protein, utrophin, is expressed on the sarcolemma of regenerating human skeletal muscle  
724 fibres in dystrophies and inflammatory myopathies. *Neuromuscular disorders : NMD*, **2**, 177-  
725 184.
- 726 60 Janghra, N., Morgan, J.E., Sewry, C.A., Wilson, F.X., Davies, K.E., Muntoni, F. and  
727 Tinsley, J. (2016) Correlation of Utrophin Levels with the Dystrophin Protein Complex and  
728 Muscle Fibre Regeneration in Duchenne and Becker Muscular Dystrophy Muscle Biopsies.  
729 *PloS one*, **11**, e0150818.

- 730 61 Tinsley, J., Deconinck, N., Fisher, R., Kahn, D., Phelps, S., Gillis, J.M. and Davies, K.  
731 (1998) Expression of full-length utrophin prevents muscular dystrophy in mdx mice. *Nature*  
732 *medicine*, **4**, 1441-1444.
- 733 62 Tinsley, J.M., Potter, A.C., Phelps, S.R., Fisher, R., Trickett, J.I. and Davies, K.E. (1996)  
734 Amelioration of the dystrophic phenotype of mdx mice using a truncated utrophin  
735 transgene. *Nature*, **384**, 349-353.
- 736 63 Dean, R.A., Cox, J.H., Bellac, C.L., Doucet, A., Starr, A.E. and Overall, C.M. (2008)  
737 Macrophage-specific metalloelastase (MMP-12) truncates and inactivates ELR+ CXC  
738 chemokines and generates CCL2, -7, -8, and -13 antagonists: potential role of the  
739 macrophage in terminating polymorphonuclear leukocyte influx. *Blood*, **112**, 3455-3464.
- 740 64 Biancheri, P., Brezski, R.J., Di Sabatino, A., Greenplate, A.R., Soring, K.L., Corazza,  
741 G.R., Kok, K.B., Rovedatti, L., Vossenkamper, A., Ahmad, N. *et al.* (2015) Proteolytic cleavage  
742 and loss of function of biologic agents that neutralize tumor necrosis factor in the mucosa of  
743 patients with inflammatory bowel disease. *Gastroenterology*, **149**, 1564-1574.e1563.
- 744 65 Mukund, K. and Subramaniam, S. (2015) Dysregulated mechanisms underlying  
745 Duchenne muscular dystrophy from co-expression network preservation analysis. *BMC*  
746 *research notes*, **8**, 182.
- 747 66 An, H.B., Zheng, H.C., Zhang, L., Ma, L. and Liu, Z.Y. (2013) Partial least squares based  
748 identification of Duchenne muscular dystrophy specific genes. *Journal of Zhejiang*  
749 *University. Science. B*, **14**, 973-982.
- 750 67 Jarve, A., Muhlstedt, S., Qadri, F., Nickl, B., Schulz, H., Hubner, N., Ozelik, C. and  
751 Bader, M. (2017) Adverse left ventricular remodeling by glycoprotein nonmetastatic  
752 melanoma protein B in myocardial infarction. *FASEB journal : official publication of the*  
753 *Federation of American Societies for Experimental Biology*, **31**, 556-568.
- 754 68 Omura, S., Kawai, E., Sato, F., Martinez, N.E., Chaitanya, G.V., Rollyson, P.A., Cvek, U.,  
755 Trutschl, M., Alexander, J.S. and Tsunoda, I. (2014) Bioinformatics multivariate analysis  
756 determined a set of phase-specific biomarker candidates in a novel mouse model for viral  
757 myocarditis. *Circulation. Cardiovascular genetics*, **7**, 444-454.
- 758 69 Bakay, M., Zhao, P., Chen, J. and Hoffman, E.P. (2002) A web-accessible complete  
759 transcriptome of normal human and DMD muscle. *Neuromuscular disorders : NMD*, **12**  
760 **Suppl 1**, S125-141.
- 761 70 Haslett, J.N., Sanoudou, D., Kho, A.T., Bennett, R.R., Greenberg, S.A., Kohane, I.S.,  
762 Beggs, A.H. and Kunkel, L.M. (2002) Gene expression comparison of biopsies from Duchenne  
763 muscular dystrophy (DMD) and normal skeletal muscle. *Proceedings of the National*  
764 *Academy of Sciences of the United States of America*, **99**, 15000-15005.
- 765 71 Zanotti, S., Gibertini, S., Di Blasi, C., Cappelletti, C., Bernasconi, P., Mantegazza, R.,  
766 Morandi, L. and Mora, M. (2011) Osteopontin is highly expressed in severely dystrophic  
767 muscle and seems to play a role in muscle regeneration and fibrosis. *Histopathology*, **59**,  
768 1215-1228.
- 769 72 Pagel, C.N., Wasgewater Wijesinghe, D.K., Taghavi Esfandouni, N. and Mackie, E.J.  
770 (2014) Osteopontin, inflammation and myogenesis: influencing regeneration, fibrosis and  
771 size of skeletal muscle. *Journal of cell communication and signaling*, **8**, 95-103.
- 772 73 Vetrone, S.A., Montecino-Rodriguez, E., Kudryashova, E., Kramerova, I., Hoffman,  
773 E.P., Liu, S.D., Miceli, M.C. and Spencer, M.J. (2009) Osteopontin promotes fibrosis in  
774 dystrophic mouse muscle by modulating immune cell subsets and intramuscular TGF-beta.  
775 *The Journal of clinical investigation*, **119**, 1583-1594.

776 74 de Oliveira, B.M., Matsumura, C.Y., Fontes-Oliveira, C.C., Gawlik, K.I., Acosta, H.,  
777 Wernhoff, P. and Durbeej, M. (2014) Quantitative proteomic analysis reveals metabolic  
778 alterations, calcium dysregulation, and increased expression of extracellular matrix proteins  
779 in laminin alpha2 chain-deficient muscle. *Molecular & cellular proteomics : MCP*, **13**, 3001-  
780 3013.

781 75 Mehuron, T., Kumar, A., Duarte, L., Yamauchi, J., Accorsi, A. and Girgenrath, M.  
782 (2014) Dysregulation of matricellular proteins is an early signature of pathology in laminin-  
783 deficient muscular dystrophy. *Skelet Muscle*, **4**, 14.

784 76 Pessina, P., Cabrera, D., Morales, M.G., Riquelme, C.A., Gutierrez, J., Serrano, A.L.,  
785 Brandan, E. and Munoz-Canoves, P. (2014) Novel and optimized strategies for inducing  
786 fibrosis in vivo: focus on Duchenne Muscular Dystrophy. *Skelet Muscle*, **4**, 7.

787 77 Trens, F., Haroun, S., Cloutier, A., Richter, M.V. and Grenier, G. (2010) A muscle  
788 resident cell population promotes fibrosis in hindlimb skeletal muscles of mdx mice through  
789 the Wnt canonical pathway. *American journal of physiology. Cell physiology*, **299**, C939-947.

790 78 Vidal, B., Serrano, A.L., Tjwa, M., Suelves, M., Ardite, E., De Mori, R., Baeza-Raja, B.,  
791 Martinez de Lagran, M., Lafuste, P., Ruiz-Bonilla, V. *et al.* (2008) Fibrinogen drives dystrophic  
792 muscle fibrosis via a TGFbeta/alternative macrophage activation pathway. *Genes &*  
793 *development*, **22**, 1747-1752.

794 79 Carberry, S., Zwyer, M., Swandulla, D. and Ohlendieck, K. (2012) Proteomics reveals  
795 drastic increase of extracellular matrix proteins collagen and dermatopontin in the aged  
796 mdx diaphragm model of Duchenne muscular dystrophy. *International journal of molecular*  
797 *medicine*, **30**, 229-234.

798 80 Carberry, S., Zwyer, M., Swandulla, D. and Ohlendieck, K. (2013) Application of  
799 fluorescence two-dimensional difference in-gel electrophoresis as a proteomic biomarker  
800 discovery tool in muscular dystrophy research. *Biology*, **2**, 1438-1464.

801 81 Goldspink, G., Fernandes, K., Williams, P.E. and Wells, D.J. (1994) Age-related  
802 changes in collagen gene expression in the muscles of mdx dystrophic and normal mice.  
803 *Neuromuscular disorders : NMD*, **4**, 183-191.

804 82 Holland, A., Dowling, P., Meleady, P., Henry, M., Zwyer, M., Mundegar, R.R.,  
805 Swandulla, D. and Ohlendieck, K. (2015) Label-free mass spectrometric analysis of the mdx-  
806 4cv diaphragm identifies the matricellular protein periostin as a potential factor involved in  
807 dystrophinopathy-related fibrosis. *Proteomics*, **15**, 2318-2331.

808 83 Murphy, S., Henry, M., Meleady, P., Zwyer, M., Mundegar, R.R., Swandulla, D. and  
809 Ohlendieck, K. (2015) Simultaneous Pathoproteomic Evaluation of the Dystrophin-  
810 Glycoprotein Complex and Secondary Changes in the mdx-4cv Mouse Model of Duchenne  
811 Muscular Dystrophy. *Biology*, **4**, 397-423.

812 84 Lorts, A., Schwanekamp, J.A., Baudino, T.A., McNally, E.M. and Molkenkin, J.D. (2012)  
813 Deletion of periostin reduces muscular dystrophy and fibrosis in mice by modulating the  
814 transforming growth factor-beta pathway. *Proceedings of the National Academy of Sciences*  
815 *of the United States of America*, **109**, 10978-10983.

816 85 Amara, S., Lopez, K., Banan, B., Brown, S.K., Whalen, M., Myles, E., Ivy, M.T.,  
817 Johnson, T., Schey, K.L. and Tiriveedhi, V. (2015) Synergistic effect of pro-inflammatory  
818 TNFalpha and IL-17 in periostin mediated collagen deposition: potential role in liver fibrosis.  
819 *Molecular immunology*, **64**, 26-35.

820  
821

**Table 1. Primer sequences used for qPCR.**

| <b>Primer Name</b> | <b>Sequence Forward (5'-3')</b>    | <b>Sequence Reverse (5'-3')</b> |
|--------------------|------------------------------------|---------------------------------|
| <i>Cd163</i>       | TGC GCC GAC GTG TTC CGA AG         | GCT GGC CAC TTG CTA TGC AGG G   |
| <i>CD86</i>        | TCAGCCTAGCAGGCCAGCA                | GGCTCTCACTGCCTTCACTCTGC         |
| <i>Col1a1</i>      | GAG CGG AGA GTA CTG GAT CG         | GTT CGC GCT GAT GTA CCA GT      |
| <i>Emr1</i>        | ACAGCCACGGGGCTATGGGA               | GCACCCAGGAGCAGCCCCAG            |
| <i>Gpnm1b</i>      | TCT GAA CCG AGC CCT GAC ATC        | AGC AGT AGC GGC CAT GTG AAG     |
| <i>Hprt</i>        | GATTAGCGATGATGAACCAGTT             | TCCAAATCCTCGGCATAATGAT          |
| <i>Il10</i>        | TGCGGCTGAGGCGCTGTCATC              | ACTCTTACCTGCTCCACTGCCTT         |
| <i>Il1b</i>        | CTCGGCCAAGACAGGTCGCTC              | CCCCCACACGTTGACAGCTAGG          |
| <i>Il6</i>         | TCTCTGCAAGAGACTTCCATCCAGT          | AGTAGGGAAGGCCGTGGTTGTCA         |
| <i>Itgb2</i>       | AGT TGC CGG GAC TGT ATC C          | TGA TAT CAT CGG CTG GAC AA      |
| <i>Lgals3</i>      | ATG ACC TGC CCT TGC CTG            | TCA CTG TGC CCA TGA TTG TGA     |
| <i>Mpeg1</i>       | GCC TTC TGA CAG AGC TTT CAC T      | GGG GCA AAC AGA AGG ATG GA      |
| <i>Pstn</i>        | AAG GAA AAG GGT CAT ACA CGT ACT TC | CCT CTG CGA ATG TCA GAA TCC     |
| <i>Ssp1</i>        | GCT TGG CTT ATG GAC TGA GG         | CGC TCT TCA TGT GAG AGG TG      |
| <i>TNF</i>         | CAAATGGCCTCCCTCTCAT                | TGGGCTACAGGCTTGTCACT            |

A

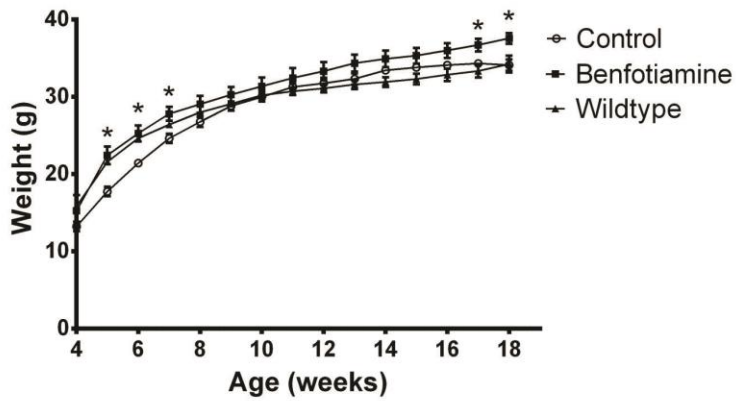

B

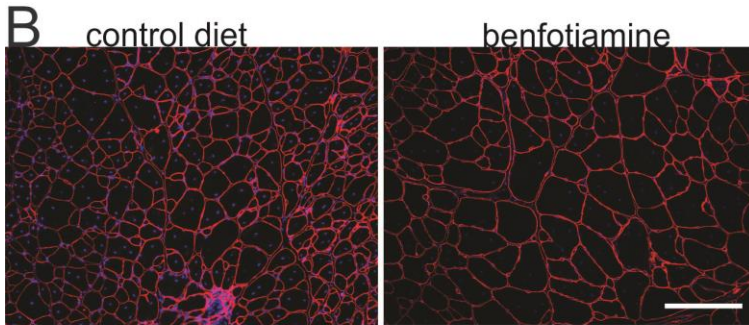

C

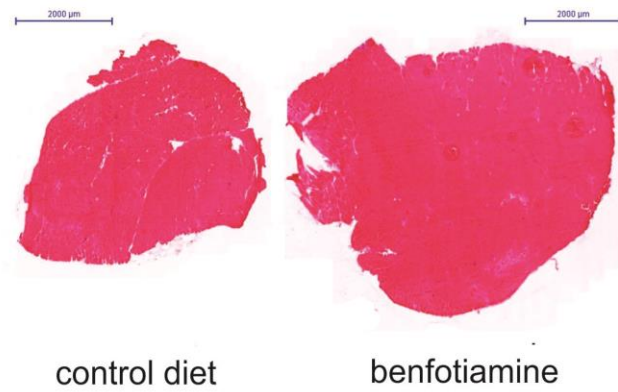

D

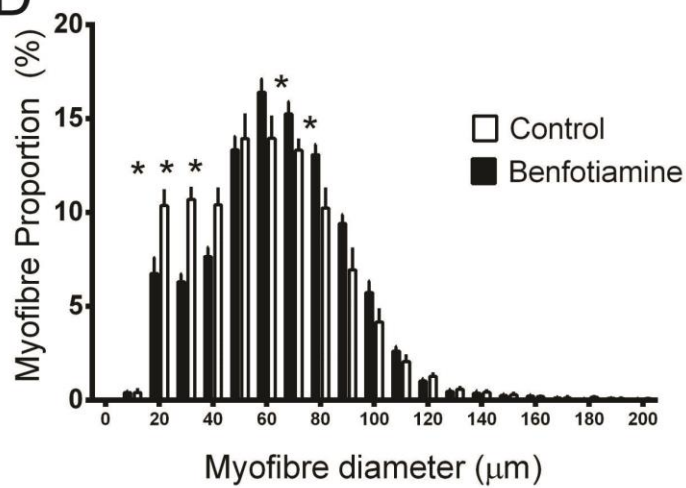

Figure 1.

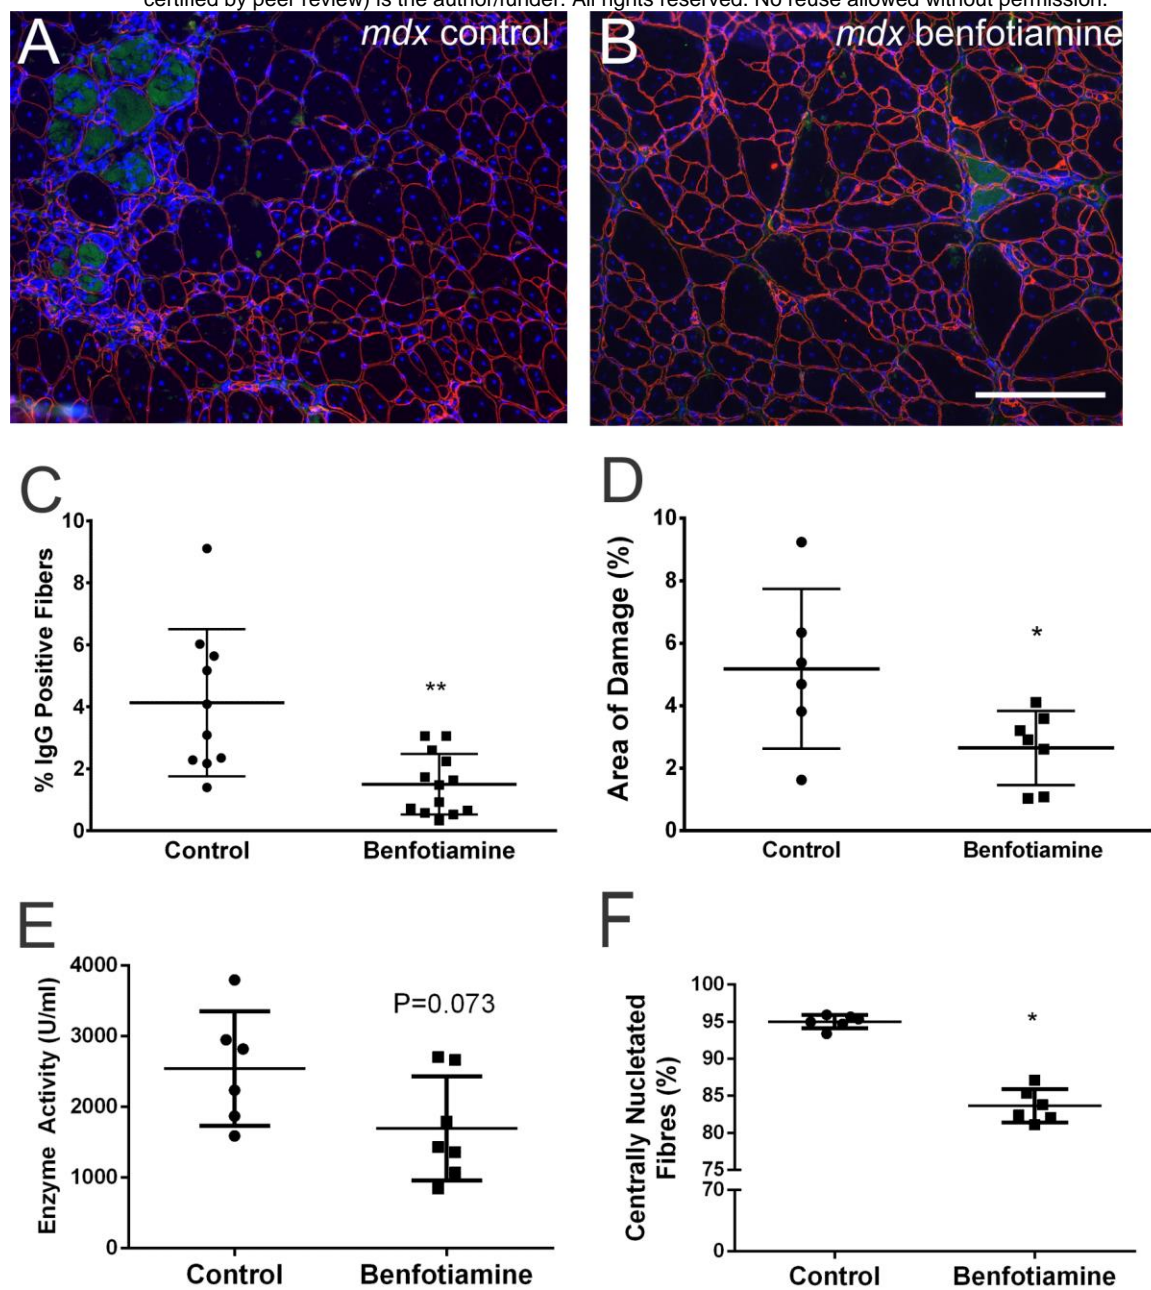

Figure 2.

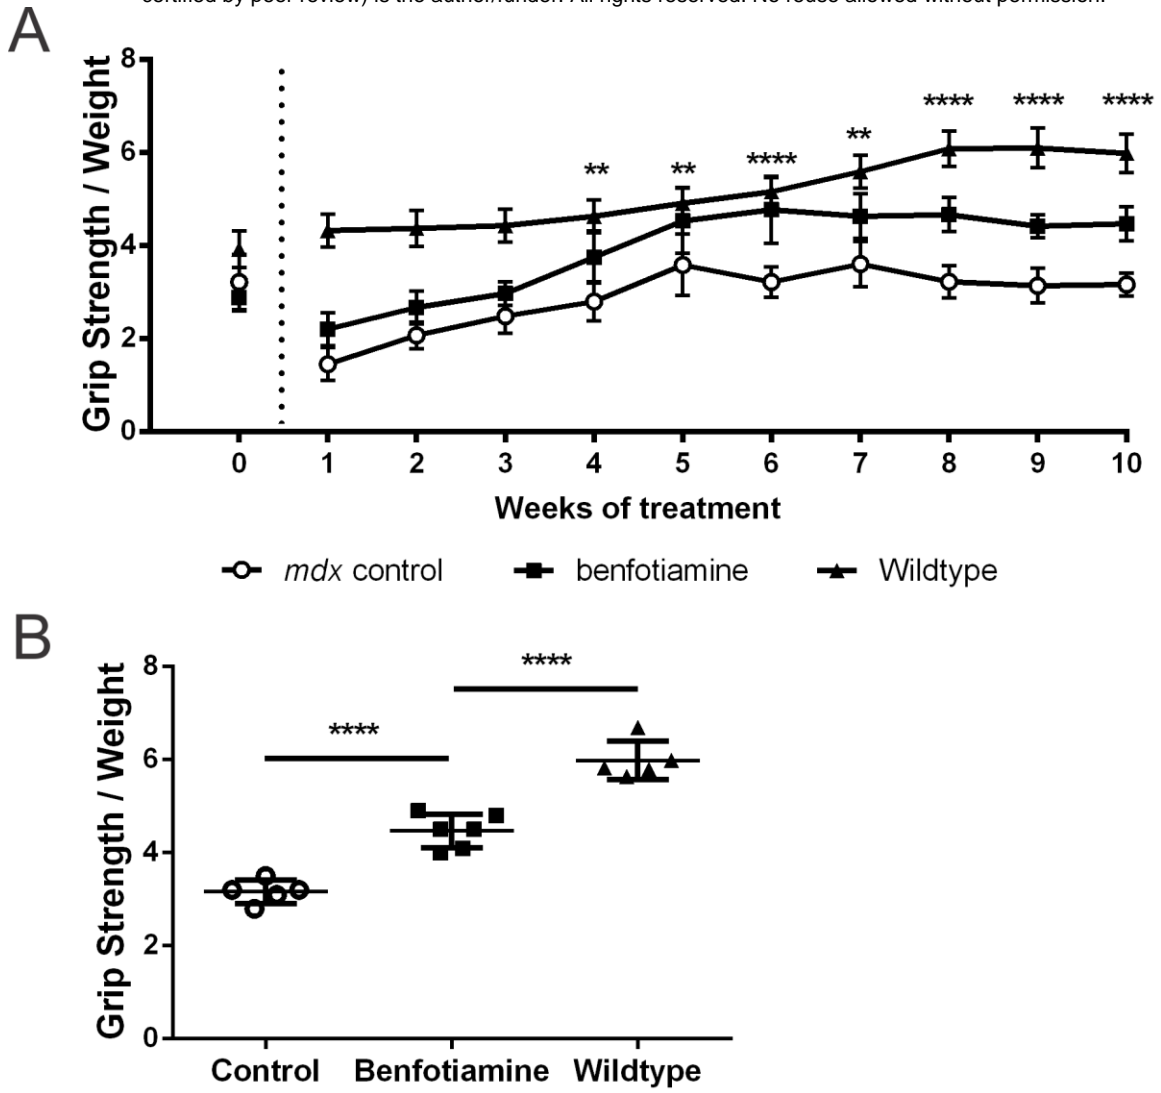



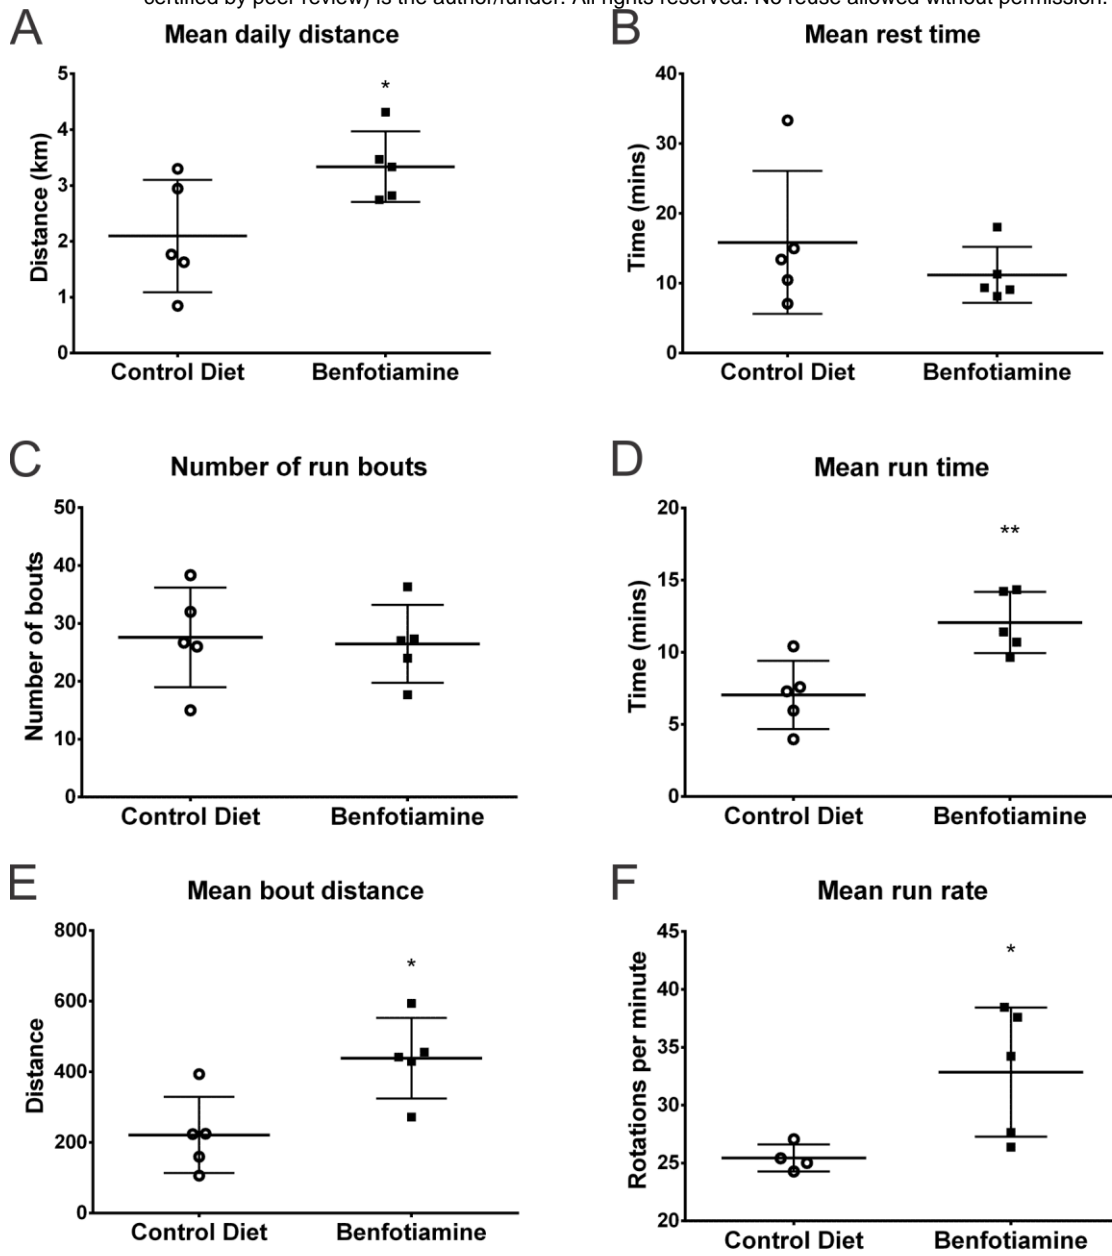

Figure 4.

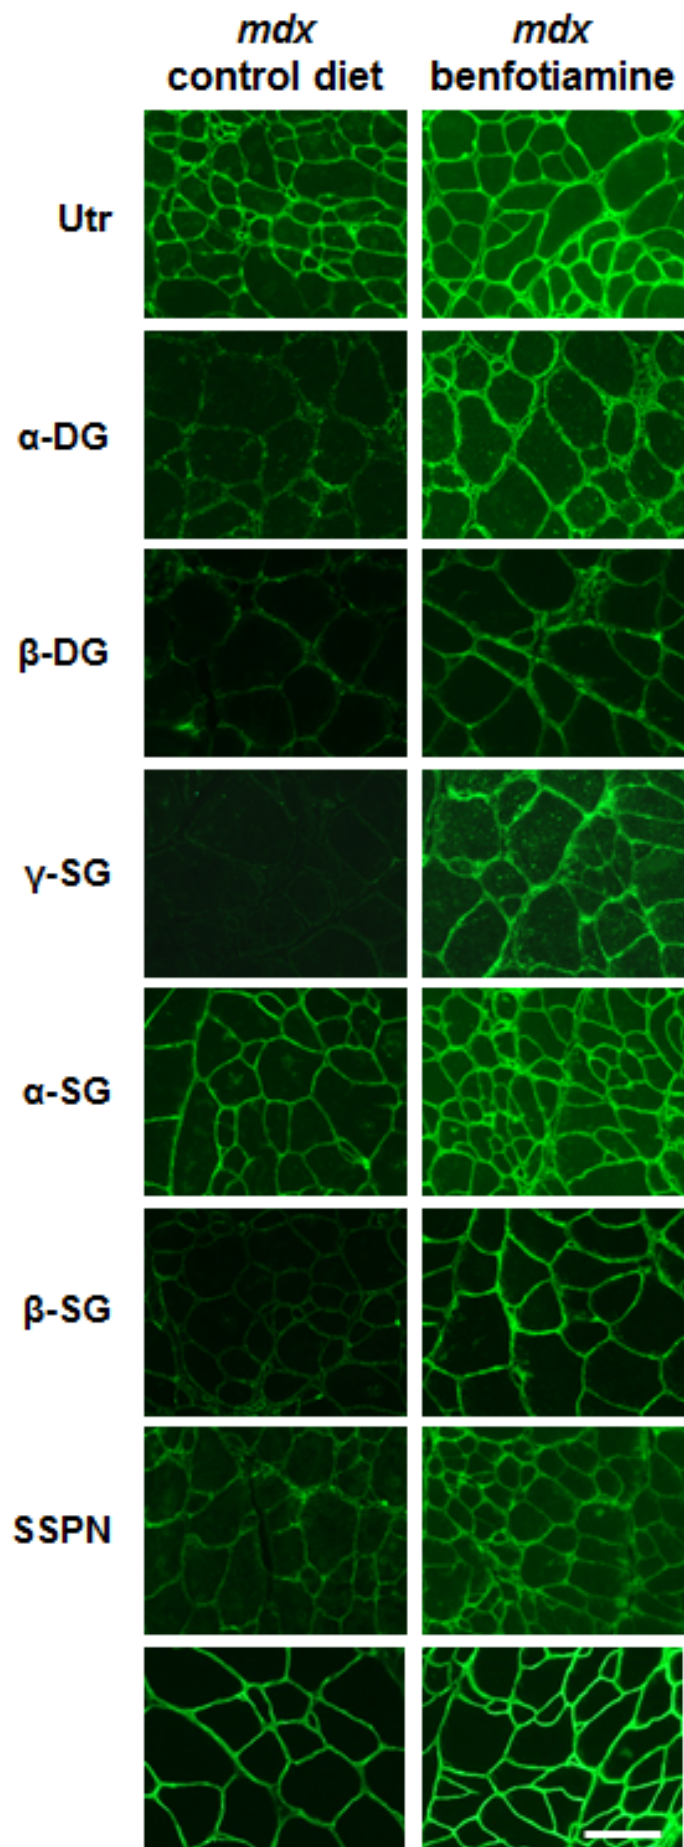

Figure 5.

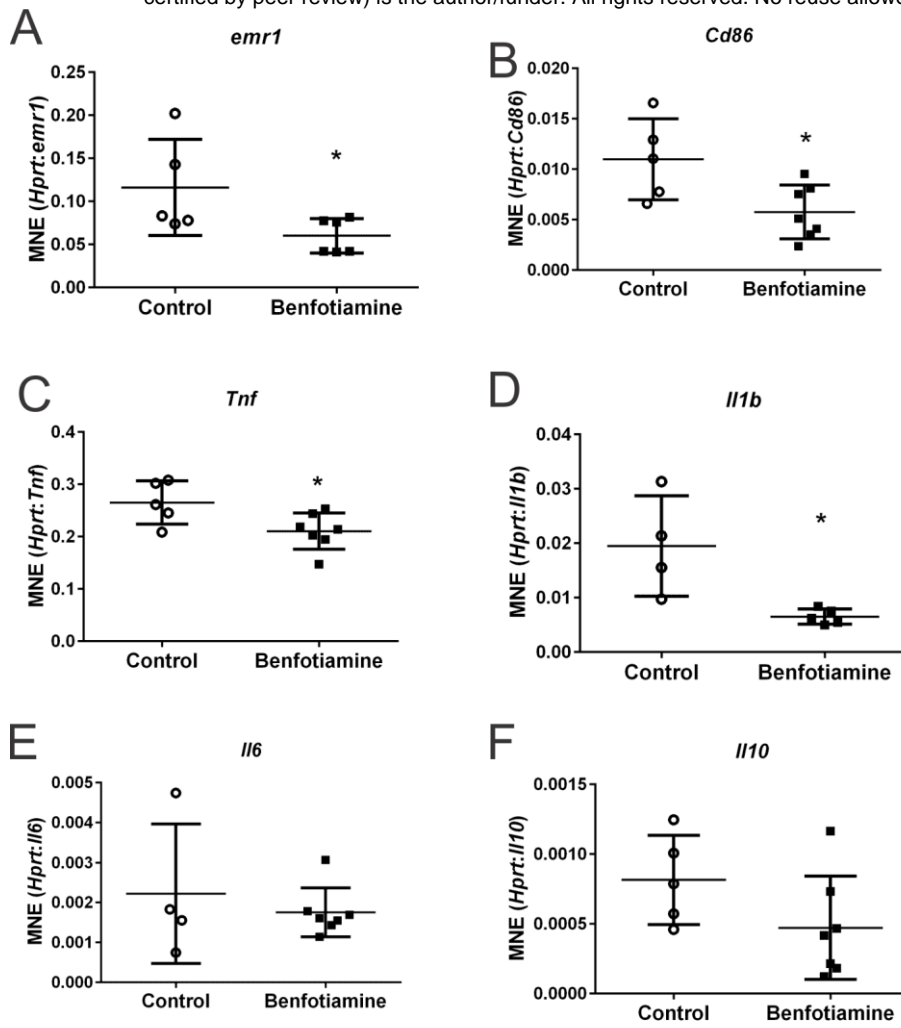

Figure 6.

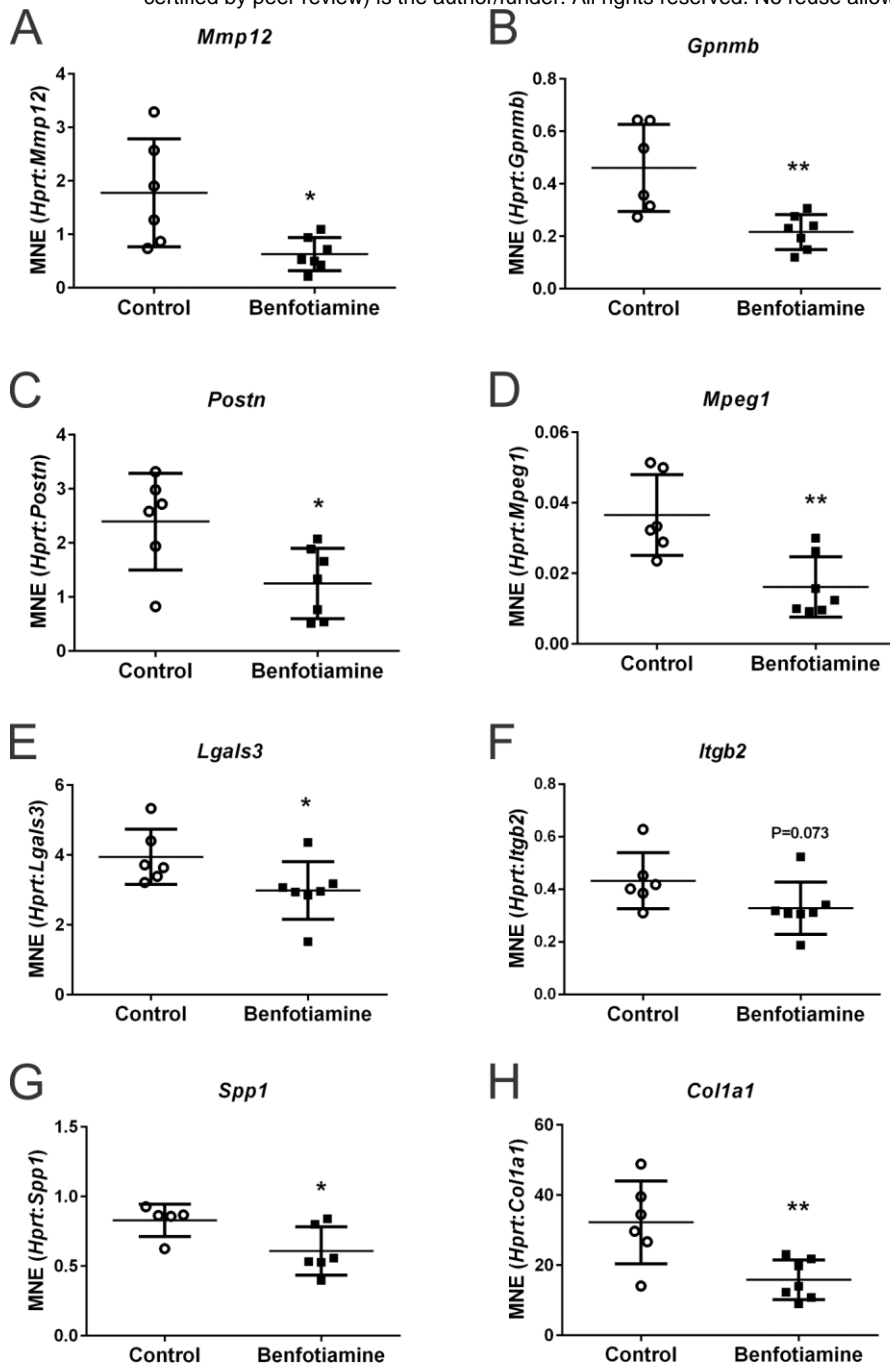

Figure 7.
